# Supplementary material
Source: Springer Nature journal article supplement (https://www.springermedizin.de/resource/supplementary/12936_2008_852_MOESM8_ESM.pdf/9548400)
Supplement: MOESM8 [file 9548400]

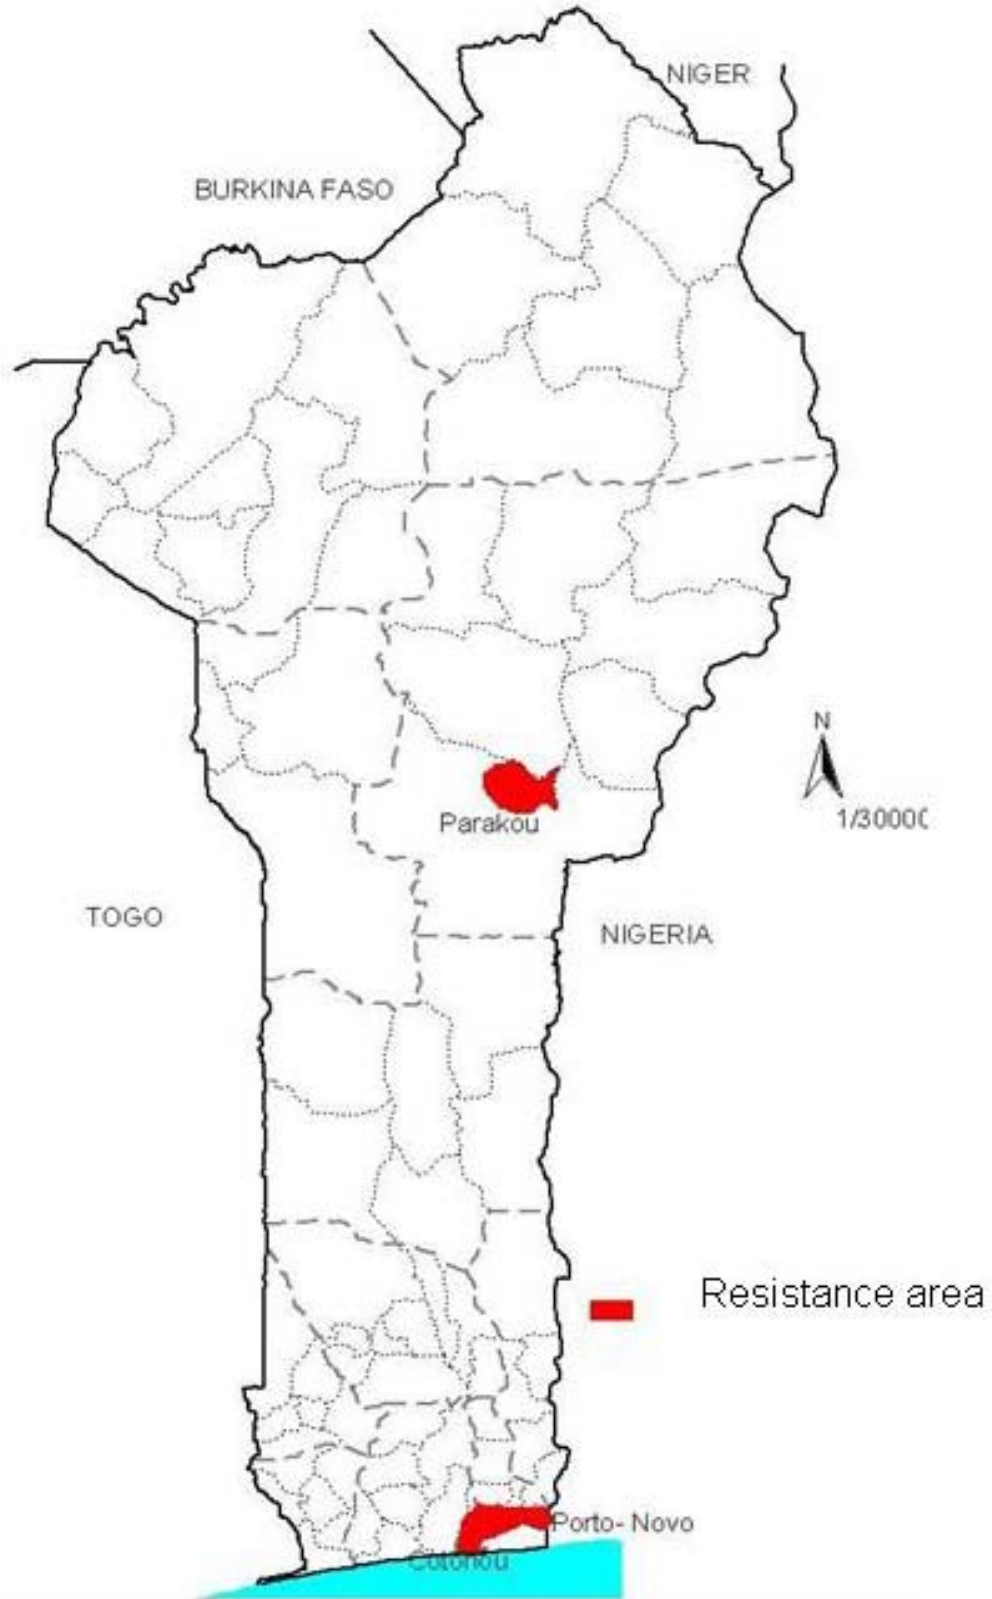

**Figure 10** : Map of distribution of *An.gambiae* resistance to permethrine in market gardens at the three sites of study (january 2006-february 2007).
